# Supplementary material for: Atomic scale imaging of competing polar states in a Ruddlesden–Popper layered oxide
Source: PubMed Central journal article supplement (PMC5013660; doi:10.1038/ncomms12572), 2016-08-31
Supplement: ncomms12572-s1.pdf [file ncomms12572-s1.pdf]

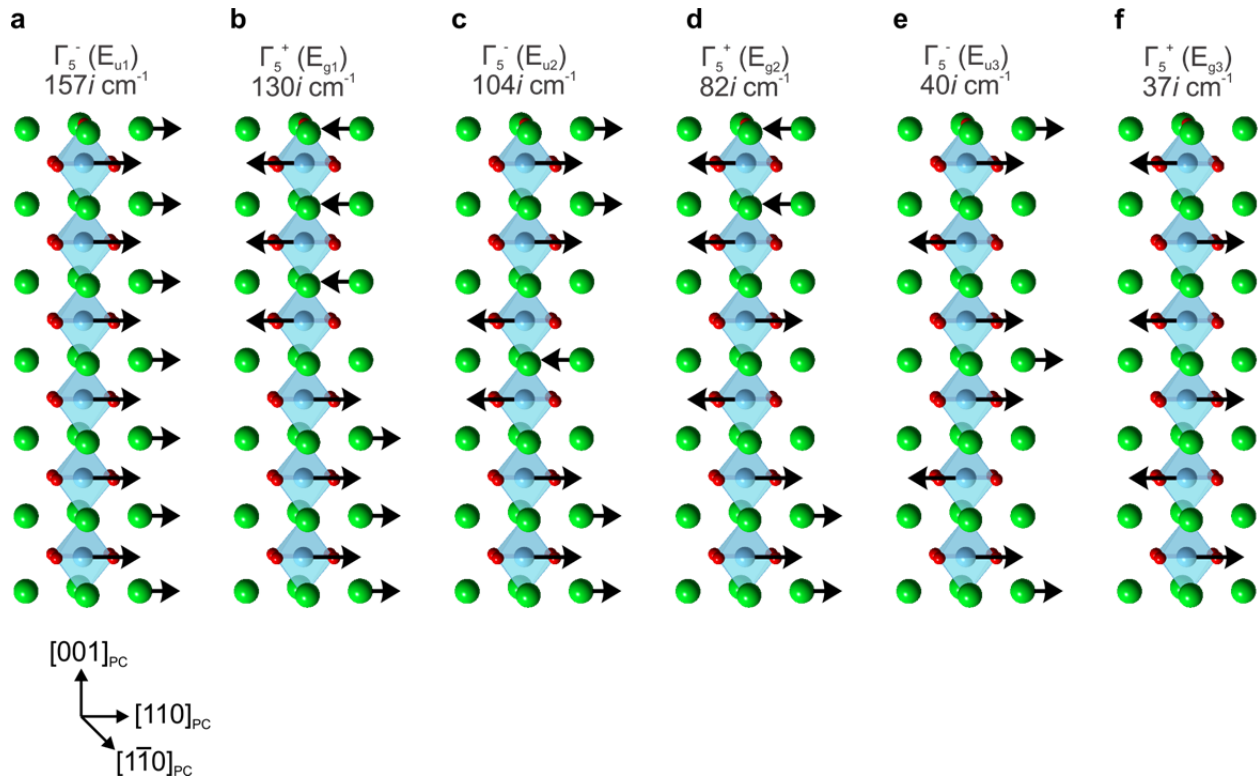

1

2 **Supplementary Figure 1 | Density Functional Theory (DFT) calculated unstable  $\Gamma$ -point phonon**

3 **modes in  $\text{Sr}_7\text{Ti}_6\text{O}_{19}$ .** Qualitative displacement of the cations away from the parent paraelectric structure

4 (black arrows) for six phonon modes at the gamma point predicted to be unstable by DFT calculations.

5 The oxygen atomic columns in each layer displace in the opposite direction to the cations (not shown).

6 Calculations are performed for  $\text{Sr}_7\text{Ti}_6\text{O}_{19}$  with 1.7% tensile strain. For clarity, only one perovskite block is

7 shown. The first three of these modes (a)-(c)  $E_{u1}$ ,  $E_{g1}$ , and  $E_{u2}$  lead to (meta-)stable phases. However, the

8 other three unstable modes (d)-(f)  $E_{g2}$ ,  $E_{u3}$ , and  $E_{g3}$  do *not* lead to a stable phase. In other words, they

9 correspond to a saddle point in the energy landscape rather than a local minimum. The reason, partly, is

10 that they transform as the same irreducible representation as the other unstable modes that can further

11 lower the energy without changing the symmetry of the crystal structure.

12

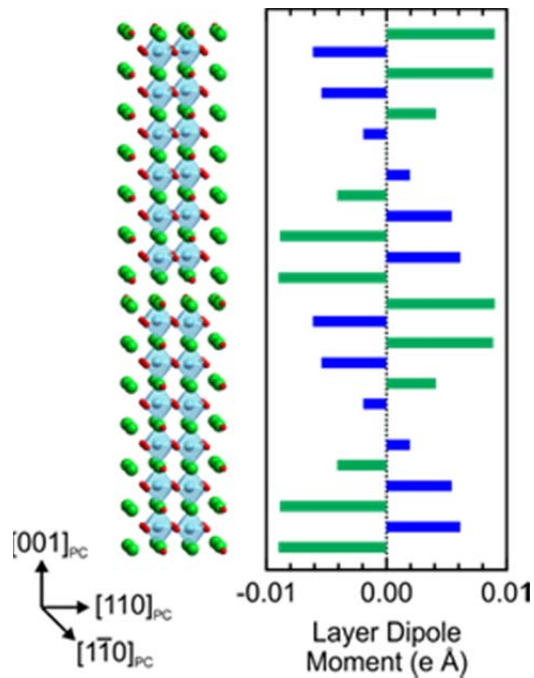

**Supplementary Figure 2 | Density Functional Theory (DFT) calculated out-of-plane polarization in ferroelectric  $\text{Sr}_7\text{Ti}_6\text{O}_{19}$ .** Layer-by-layer out-of-plane  $[001]_{\text{PC}}$  polarization arising from ferroelectric displacements away from the paraelectric positions. The unit cell of  $\text{Sr}_7\text{Ti}_6\text{O}_{19}$  is included for reference. A nearly identical profile is also seen for the other ferroic phases presented in this work. On the interface (double rock salt) layers, there are tail-to-tail dipoles which are electrostatically unfavorable, but are formed in order to optimize the local bonding environment of the ions.<sup>1</sup>

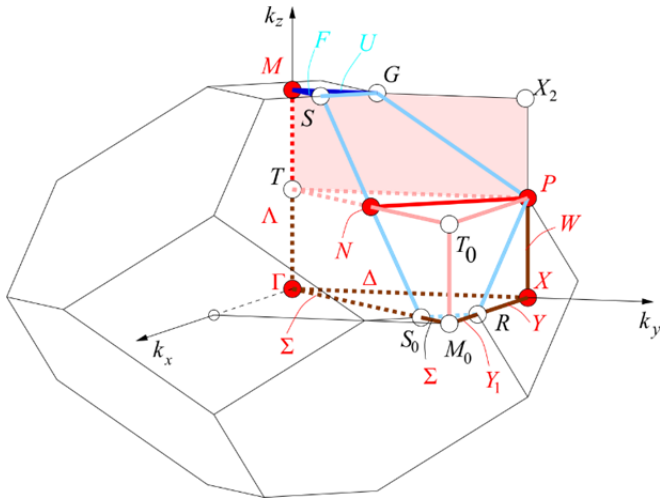

21  
 22  
 23  
 24  
 25  
 26

**Supplementary Figure 3 | High symmetry wavevectors of the space group I4/mmm.** The cell in the figure is the first Brillouin zone of the high symmetry (paraelectric) structure. Note that the x and y axes are rotated by 45 degrees from the tetragonal axes of the conventional cell, and the X point has the k-vector  $(\pi/a, \pi/a, 0)$  in the conventional basis. (Image from the Bilbao Crystallographic Server)

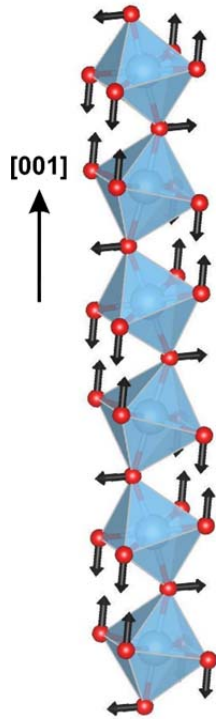

27

28 **Supplementary Figure 4 | Oxygen Octahedral Rotational Instability in  $\text{Sr}_7\text{Ti}_6\text{O}_{19}$ .** Schematic of the  
 29 strongest rotational instability of  $\text{Sr}_7\text{Ti}_6\text{O}_{19}$  at the X point (Glazer notation of  $a^-a^-c^0/a^-a^-c^0$ ), shown for one  
 30 perovskite layer. This instability involves 99% oxygen and ~1% Sr displacements. As discussed in the  
 31 text, the force constants matrix eigenvalue of this mode ( $-0.30 \text{ eV \AA}^{-2}$ ) is almost an order of magnitude  
 32 smaller than that of the FE mode. Hence, we expect that the onset of octahedral rotations occur at a  
 33 much lower temperature than the ferroelectric transition temperature. As a result, it is very unlikely to see  
 34 any signature of octahedral rotations in our room temperature (293 K) measurements.

35

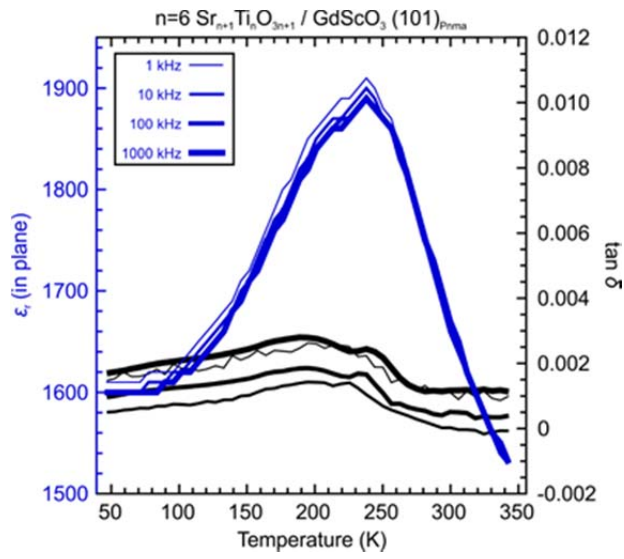

36

37 **Supplementary Figure 5 | Dielectric and ferroelectric properties of  $\text{Sr}_7\text{Ti}_6\text{O}_{19}$ .** Dielectric constant,  $\epsilon_r$ ,

38 (in blue) and dielectric tangent losses,  $\tan \delta$ , (in black) for  $n=6$ ,  $\text{Sr}_7\text{Ti}_6\text{O}_{19}$ , as a function of frequency and

39 temperature. The peak in  $\epsilon_r$  corresponds to a ferroelectric transition at  $\sim 240$  K.

40

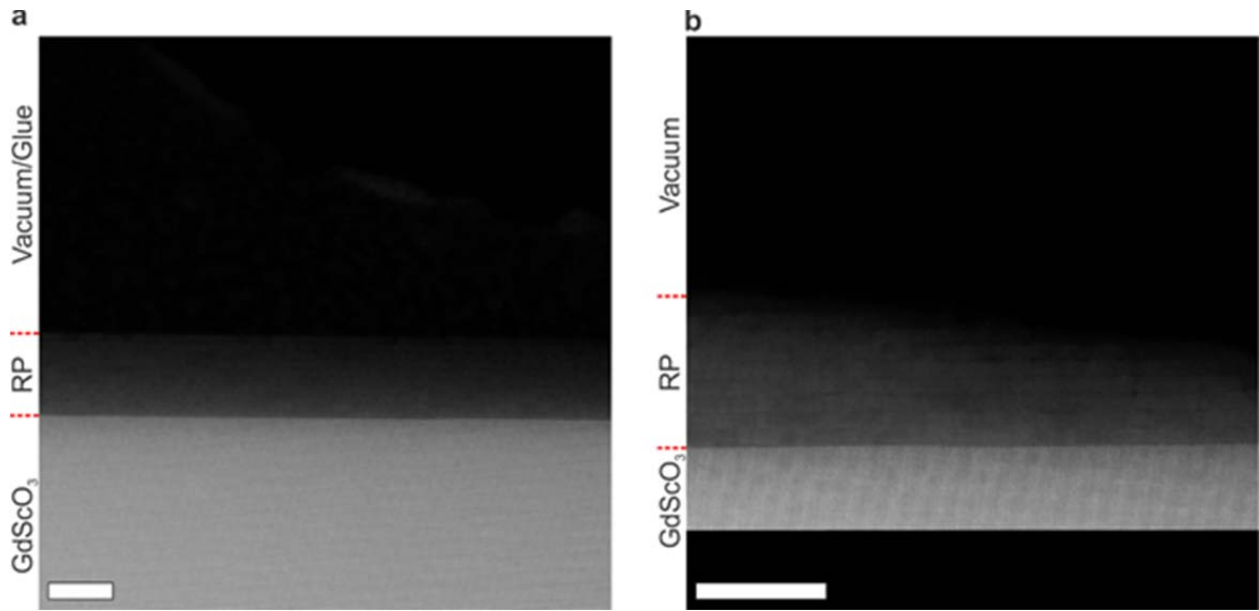

41

42 **Supplementary Figure 6 | High Angle Annular Dark Field (HAADF) images of the  $\text{Sr}_7\text{Ti}_6\text{O}_{19}$  thin film**

43 **on  $\text{GdScO}_3$  ( $101$ )<sub>Pnma</sub>.** HAADF images taken from two different areas of the thin film showing high quality,

44 epitaxial growth, and the absence of threading dislocations. Scale bar, 20 nm.

45

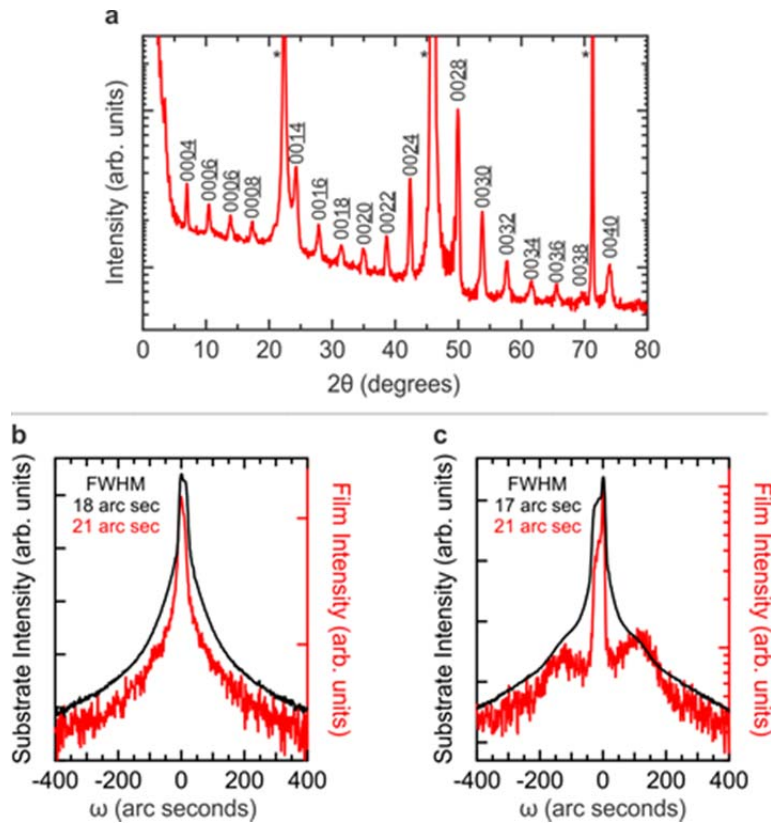

46

47 **Supplementary Figure 7 | X-ray Diffraction (XRD) characterization epitaxial  $\text{Sr}_7\text{Ti}_6\text{O}_{19}$  films grown**

48 **on  $\text{GdScO}_3 (101)_{\text{Pnma}}$ . (a)  $\theta$ - $2\theta$  XRD scan. Substrate peaks are labeled with an asterisk. (b-c) XRD**

49 **rocking curves of the (0026) peak.**

50

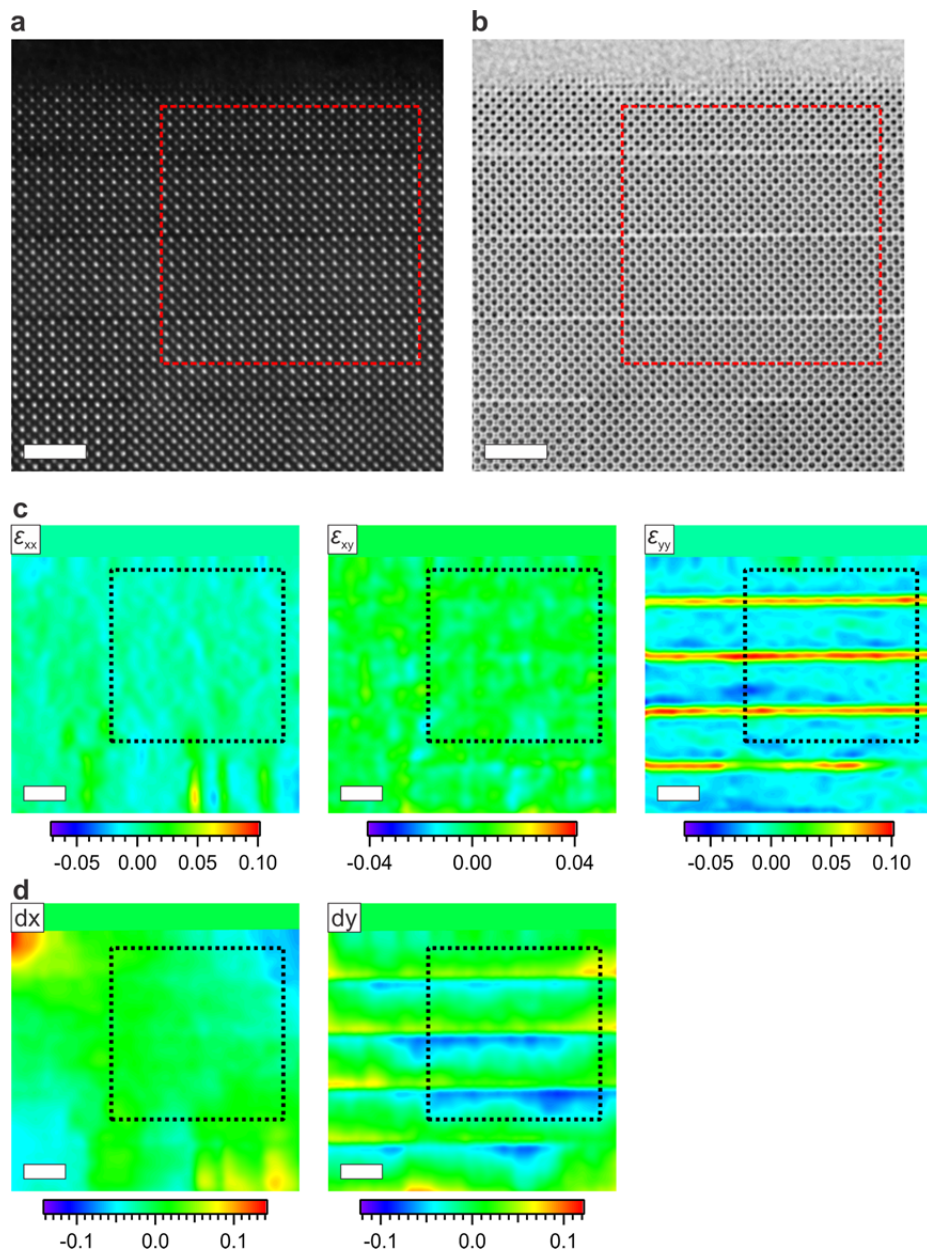

51  
 52 **Supplementary Figure 8 | HAADF, BF, and strain maps of region #1 in the  $\text{Sr}_7\text{Ti}_6\text{O}_{19}$  film.** Drift  
 53 corrected (a) HAADF and (b) BF images with the area of analysis highlighted by the dashed red box. (c)  
 54 The  $\epsilon_{xx}$ ,  $\epsilon_{xy}$ , and  $\epsilon_{yy}$  strain maps with respect to the pseudo-cubic perovskite structure of the analysis area.  
 55 The strain maps show that there are no long range structural ordering beyond the expected Ruddlesden-  
 56 Popper structure in the area of analysis. (d) Color scale maps representing the deviation of the atomic  
 57 columns from an overlaid cubic grid (dx and dy) calculated using all of the atomic columns within the  
 58 HAADF image. Scale bar is 2 nm.



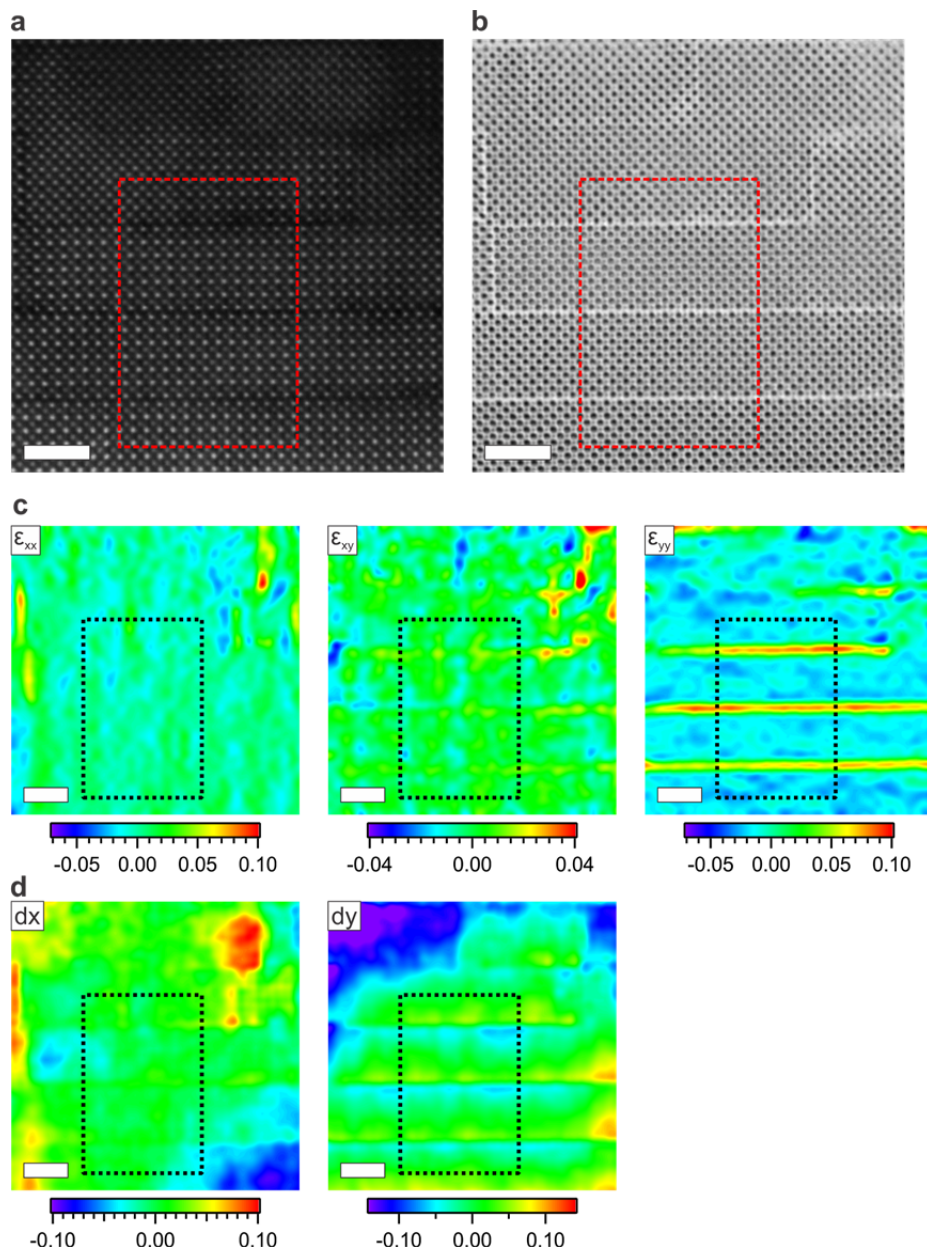

59  
60 **Supplementary Figure 9 | HAADF, BF, and strain maps of region # 2 in the  $\text{Sr}_7\text{Ti}_6\text{O}_{19}$  film.** Drift  
61 corrected (a) HAADF and (b) BF images with the area of analysis highlighted by the dashed red box. (c)  
62 The  $\epsilon_{xx}$ ,  $\epsilon_{xy}$ , and  $\epsilon_{yy}$  strain maps with respect to the pseudo-cubic perovskite structure of the analysis area.  
63 The strain maps show that there are no long range structural ordering beyond the expected Ruddlesden-  
64 Popper structure in the area of analysis. Ion and electron beam damage introduced to the structure near  
65 the rock salt layers is visible in the top and top right part of the images. (d) Color scale maps representing

66 the deviation of the atomic columns ( $dx$  and  $dy$ ) from an overlaid cubic grid calculated using all of the  
67 atomic columns within the HAADF image. Scale bar is 2 nm.  
68

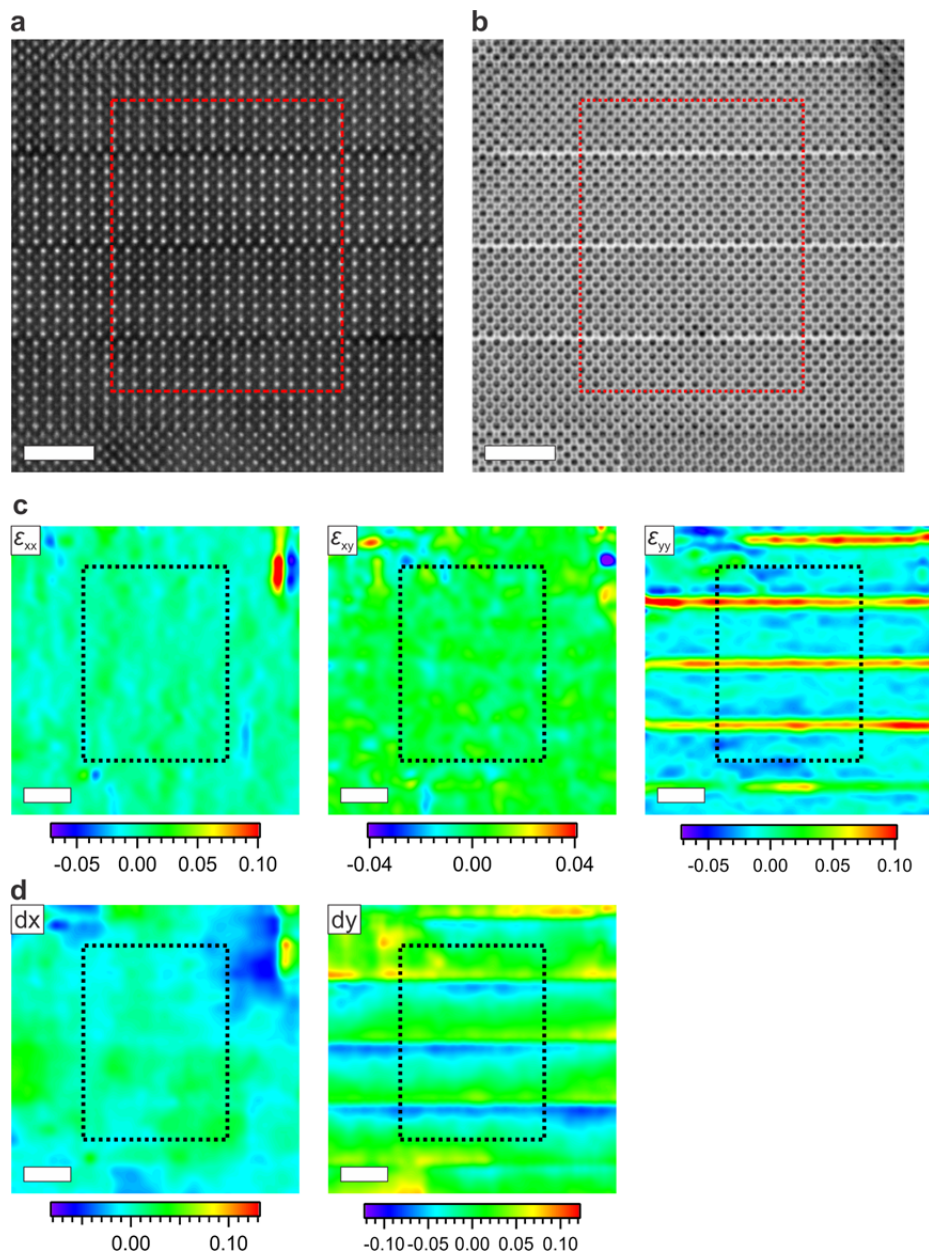

69  
 70 **Supplementary Figure 10 | HAADF, BF, and strain maps of region #3 in the  $\text{Sr}_7\text{Ti}_6\text{O}_{19}$  film.** Drift  
 71 corrected (a) HAADF and (b) BF images with the area of analysis highlighted by the dashed red box. (c)  
 72 The  $\epsilon_{xx}$ ,  $\epsilon_{xy}$ , and  $\epsilon_{yy}$  strain maps with respect to the pseudo-cubic perovskite structure of the analysis area.  
 73 The strain maps show that there are no long range structural ordering beyond the expected Ruddlesden-  
 74 Popper structure in the area of analysis. (d) Color scale maps representing the deviation of the atomic  
 75 columns (dx and dy) from an overlaid cubic grid calculated using all of the atomic columns within the  
 76 HAADF image. Scale bar is 2 nm.

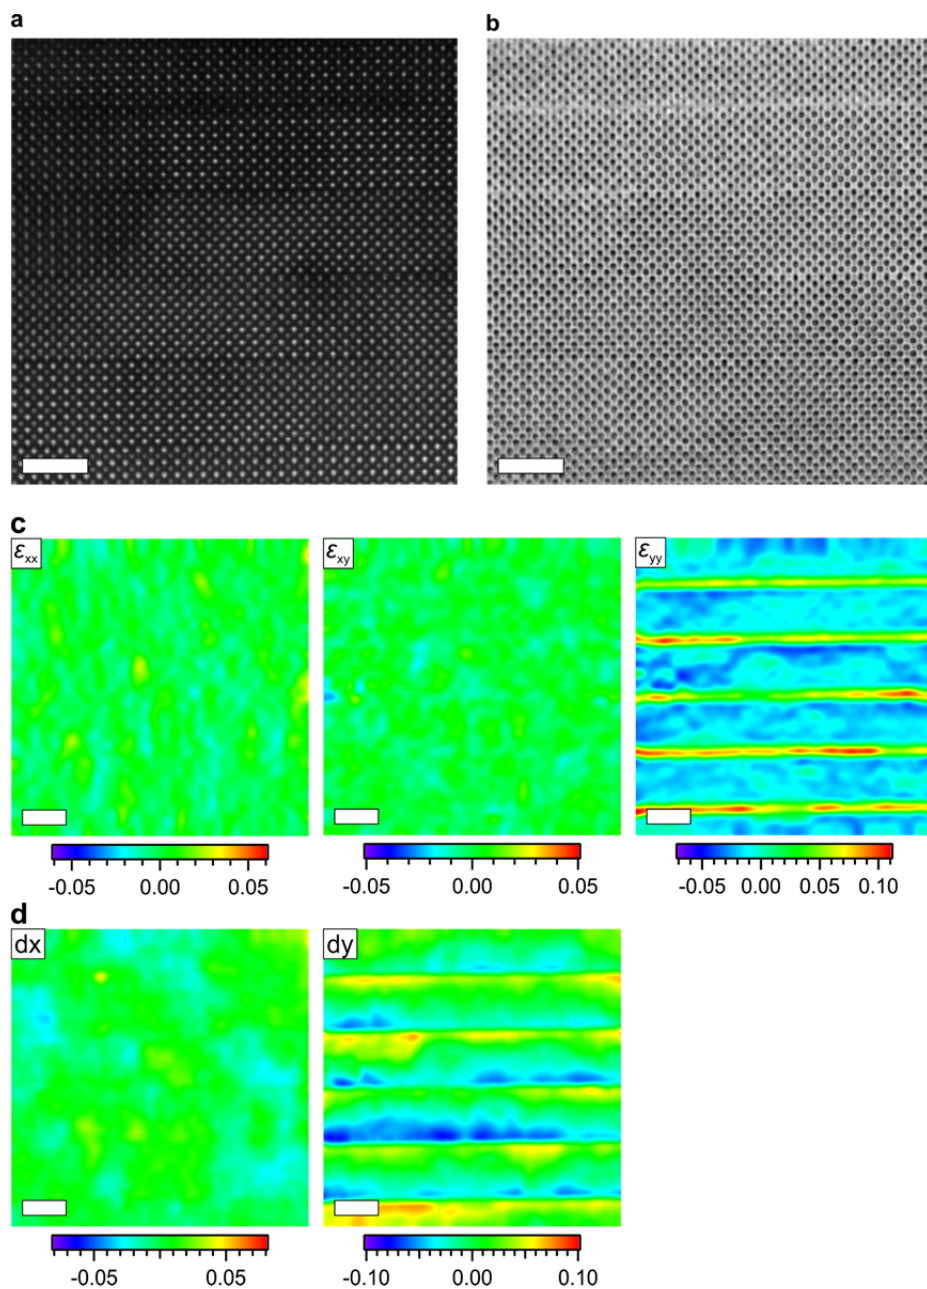

77  
 78 **Supplementary Figure 11 | HAADF, BF, and strain maps from region #4 of the  $\text{Sr}_7\text{Ti}_6\text{O}_{19}$  film.** Drift  
 79 corrected (a) HAADF and (b) BF images with the area of analysis highlighted by the dashed red box. (c)  
 80 The  $\epsilon_{xx}$ ,  $\epsilon_{xy}$ , and  $\epsilon_{yy}$  strain maps with respect to the pseudo-cubic perovskite structure of the analysis area.  
 81 The strain maps show that there are no long range structural ordering beyond the expected Ruddlesden-  
 82 Popper structure in the area of analysis. (d) Color scale maps representing the deviation of the atomic  
 83 columns (dx and dy) from an overlaid cubic grid calculated using all of the atomic columns within the  
 84 HAADF image. Scale bar is 2 nm.

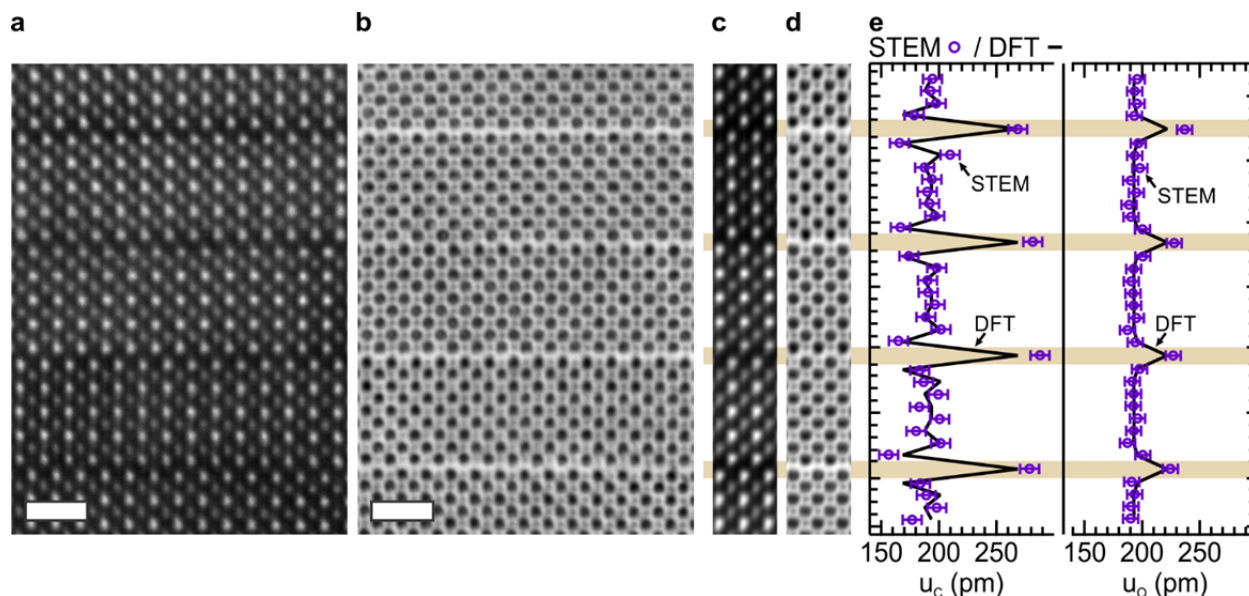

85  
 86 **Supplementary Figure 12 | High-Resolution Scanning Transmission Electron Microscopy (HR-**  
 87 **STEM) derived interatomic spacing of  $n=4$   $\text{Sr}_{n+1}\text{Ti}_n\text{O}_{3n+1}$ .** Drift corrected (a) HAADF and (b) BF images  
 88 of  $\text{Sr}_5\text{Ti}_4\text{O}_{13}$  thin films on  $\text{GdScO}_3(101)_{\text{Pnma}}$  showing the cation and oxygen atomic columns. Scale bar is  
 89 1 nm. (c-d) constructed average slice of the HAADF and BF images. (e) HAADF and BF derived  
 90 interatomic spacing of  $\text{Sr}_5\text{Ti}_4\text{O}_{13}$  (open purple circles) overlapped with the DFT values (solid gray line)  
 91 showing exceptional agreement between theory and experiments. The error bars are taken to be the root  
 92 mean standard deviation from the positions of a best fit lattice determined by cross validation.  
 93

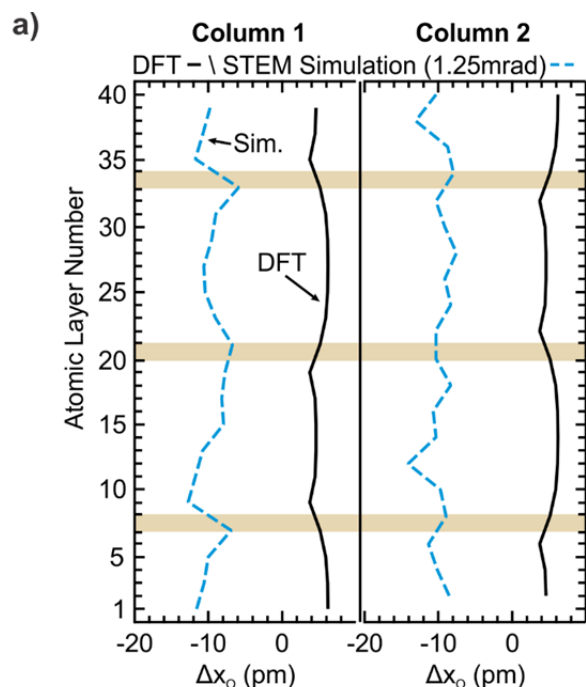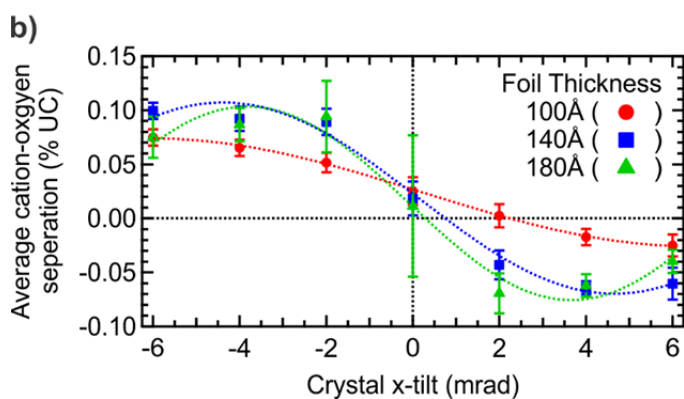

94

95 **Supplementary Figure 13 | Simulated average cation-oxygen in-plane displacements.** a) DFT

96 calculated positions and simulated BF oxygen positions of the **ferroelectric**  $\text{Sr}_7\text{Ti}_6\text{O}_{19}$  structure on  $\text{GdScO}_3$

97  $(101)_{\text{Pnma}}$  with a sample tilt of 1.25 mrad. The simulated images show the **oxygen atomic columns**

98 experience a large in-plane shift due to sample tilt. b) The average cation-oxygen in-plane displacements

99 were calculated from simulated HAADF and BF STEM images for a defocus of 100 Å and different foil

100 thicknesses, 10 nm (red circle), 14 nm (blue square) and 18 nm (green triangle). The displacements were

101 fit with a sine function (dashed line) to visualize the trend. Cation and oxygen positions were determined

102 from the simulated HAADF and BF images, respectively. **The error bars represent the root mean squared**

103 **deviation of multiple simulations at each parameter.**

104

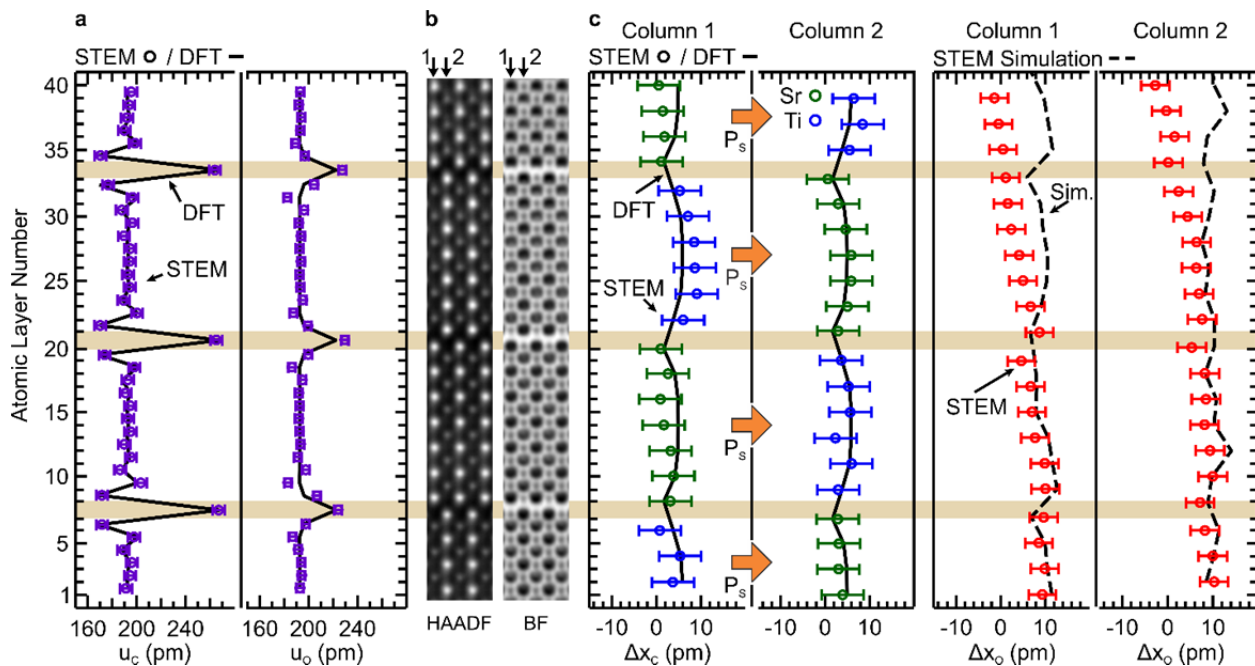

105

106 **Supplementary Figure 14 | Atomic columns in Sr<sub>7</sub>Ti<sub>6</sub>O<sub>19</sub> film region #3.** Cation  $u_c$  and oxygen  $u_o$

107 interatomic spacing (purple open circles) extracted from constructed drift corrected high angle annular

108 dark field (HAADF) and bright field (BF) STEM images superimposed on the DFT calculated values (gray

109 lines). The characteristic decrease in interplanar spacing in  $u_c$  and absence in  $u_o$  adjacent to the rock salt

110 layers indicates the presence of rumpling at the rock salt layer; exceptional agreement between

111 experiments and DFT is seen. (b) Constructed average HAADF and BF STEM slices, which are repeated

112 for clarity. (c) Cation  $\Delta x_c$  (blue and green open circles) and oxygen  $\Delta x_o$  (red open circles) displacements

113 along the  $[100]_{PC}$  direction measured from the drift corrected HAADF and BF images. The FE DFT

114 calculated value (solid gray lines) and the FE STEM simulated  $\Delta x_o$  values (dashed black line) are

115 superimposed to show agreement between simulation and experiments. The simulated  $\Delta x_o$  values were

116 done with a 1.25 mrad sample tilt around the  $[001]_{PC}$  axis. The error bars are taken to be the root mean

117 standard deviation from the positions of a best fit lattice determined by cross validation.

118

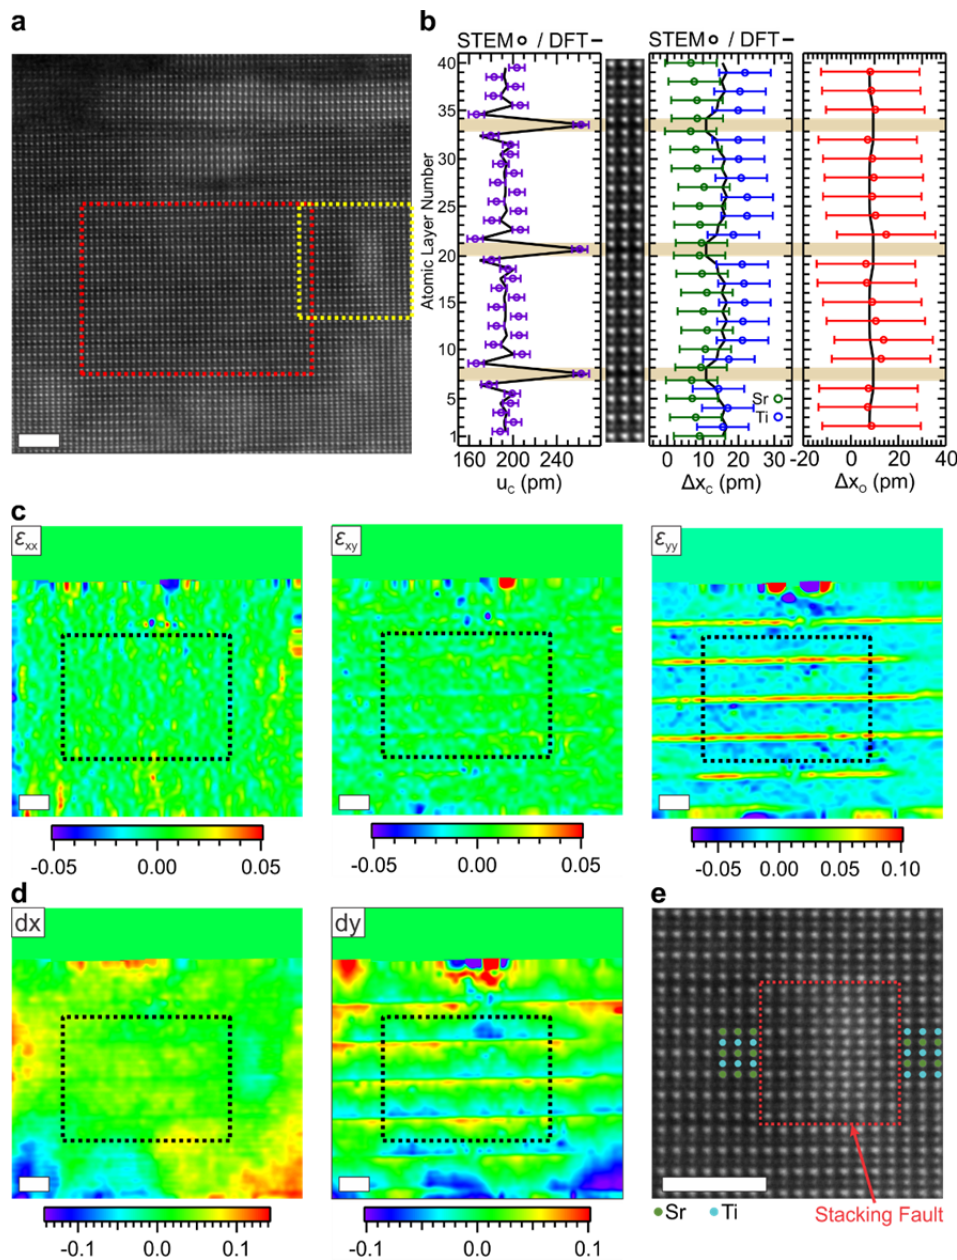

119  
 120 **Supplementary Figure 15 | Atomic structure of Sr<sub>7</sub>Ti<sub>6</sub>O<sub>19</sub> along the <110><sub>PC</sub> direction.** (a) Drift  
 121 corrected HAADF image with the area of analysis highlighted by the dashed red box and a stacking fault  
 122 highlighted by the yellow box. (b) Cation  $u_c$  interatomic spacing (purple open circles),  $\Delta x_c$  (blue and green  
 123 open circles), and  $\Delta x_o$  (red open circle) displacements along the [100]<sub>PC</sub> from the drift corrected ADF  
 124 image superimposed on the FE DFT calculated values (gray lines). The error bars are taken to be the  
 125 root mean standard deviation from the positions of a best fit lattice determined by cross validation. (c) The  
 126  $\epsilon_{xx}$ ,  $\epsilon_{xy}$ , and  $\epsilon_{yy}$  strain maps with respect to a <110><sub>PC</sub> projected perovskite structure of the analysis area.



127 The strain maps show that there are no long range structural ordering beyond the expected Ruddlesden-  
128 Popper structure in the area of analysis (d) Color scale maps representing the deviation of the atomic  
129 columns (dx and dy) from an overlaid cubic grid calculated using all of the atomic columns within the  
130 HAADF image. (e) HAADF image zoomed in on the stacking fault region highlighted in (a). Because, the  
131 stacking fault plane is 45 degrees with respect to the surface, the area in the red box contains projection  
132 of two superimposed perovskite slabs,  $n=6$  and  $n=19$ . Hence, the sharp structural features with the  
133 stacking fault as seen in Figure 5, are spread out over an area of several pseudocubic perovskite blocks.  
134 Scale bar is 2 nm. Consistent with the B-site nature of the ferroelectricity in this compound, the polar  
135 displacements of Ti cations are consistently larger than that of the Sr cations in neighboring layers. This  
136 causes the wiggle pattern in the  $\Delta x_C$  plot. While the qualitative agreement between DFT and experiments  
137 is certainly present, the magnitude of the experimental displacements (at room temperature) are larger  
138 than the DFT (0K calculation). The origin of this discrepancy is currently not understood.  
139

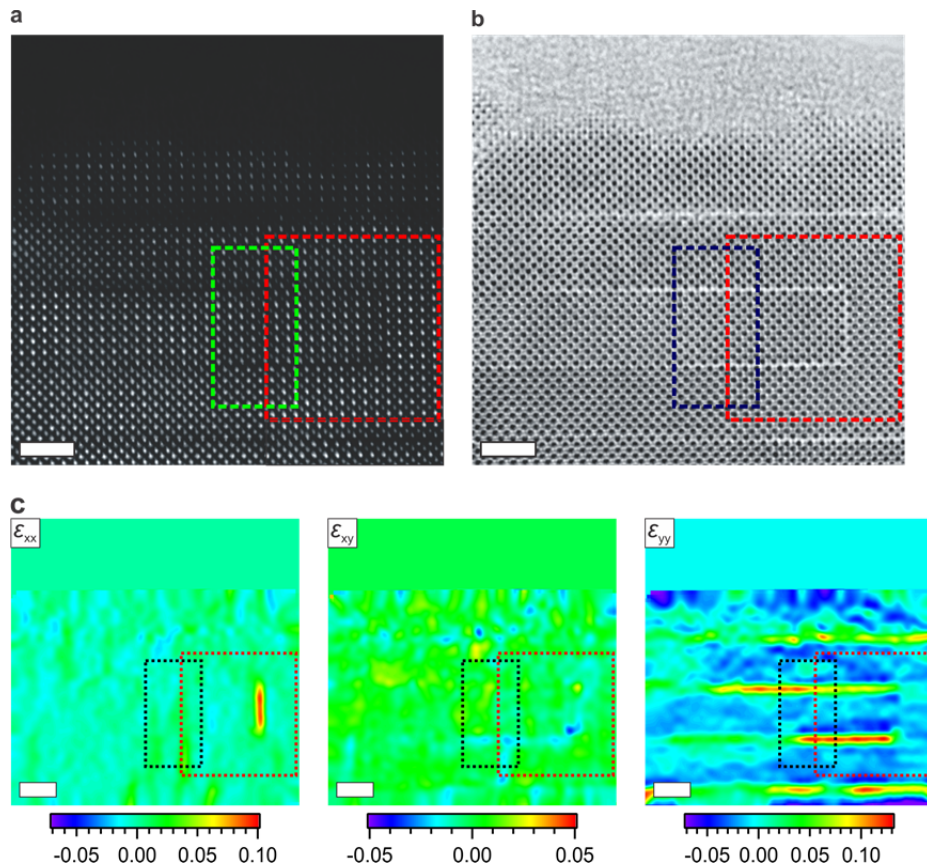

140

141 **Supplementary Figure 16 | HAADF, BF, and strain maps from a region near a stacking fault** Drift

142 corrected (a) High angle annular dark field and (b) bright field images of a stacking fault in  $\text{Sr}_7\text{Ti}_6\text{O}_{19}$  film

143 on  $\text{GdScO}_3 (101)_{\text{Pnma}}$ . The reference sample area (green box) and analyzed stacking fault area (red)

144 are highlighted in the HAADF and BF images. (c) The  $\epsilon_{xx}$ ,  $\epsilon_{xy}$ , and  $\epsilon_{yy}$  strain maps with respect to the

145 pseudo-cubic perovskite structure of the analysis area. Strain maps of the Scale bar is 2 nm.

146

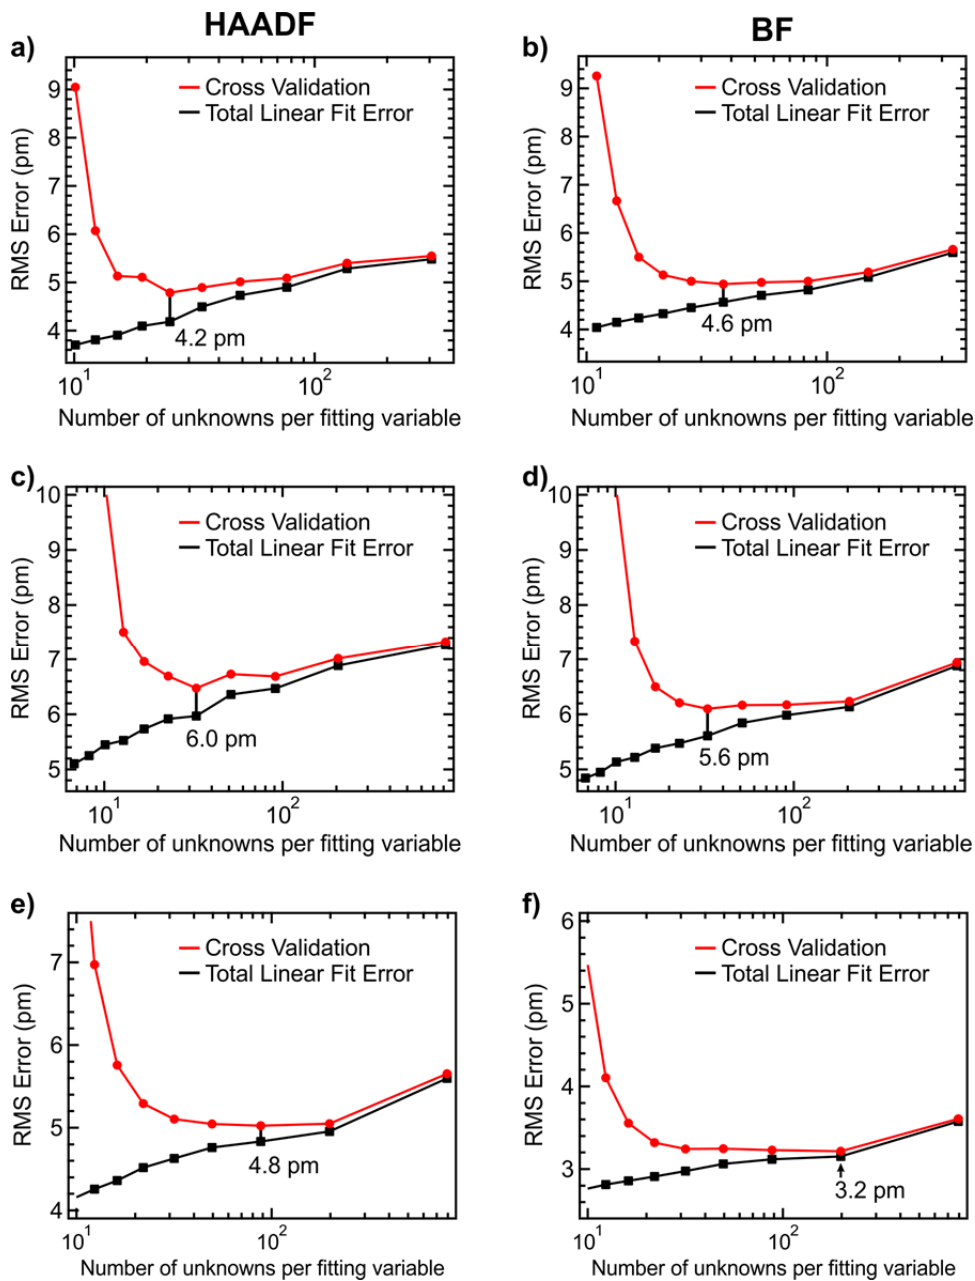

147

148 **Supplementary Figure 17 | Error estimation of atomic displacement measurements.** Average cross

149 validation (CV) scores calculated from the HAADF and BF images for regions #1, #2, and #3. Using the

150 average MRS deviation fitting error, upper bounds for the precision in our measurements are estimated to

151 be (a) 4.2 pm, (b) 4.6 pm, (c) 6.0 pm, (d) 5.6 pm, (e) 4.8 pm, and (f) 3.2 pm for region #1 HAADF, region

152 #1 BF, region #2 HAADF, region #2 BF, region #3 HAADF, and region #3 BF, respectively.

153

## 154 **Supplementary Note 1 | Irreducible Representation Analysis of Relaxed Structures**

155 We have performed an irreducible representation (irrep) analysis of the three metastable structures in the  
156 primitive unit cell as obtained from ionic relaxations in DFT. These structures correspond to the distortion  
157 patterns  $E_{u1}$ ,  $E_{g1}$ , and  $E_{u2}$ , shown in Supp. Fig. 1. The dominant irreps of the distortions for these  
158 structures are  $\Gamma_{5-}$ ,  $\Gamma_{5+}$ , and again  $\Gamma_{5-}$  respectively, with amplitudes 0.411, 0.384, and 0.327. In other words,  
159 in all of the three modes, the total ionic displacement is of similar magnitude (with a ~30% variation), but  
160 the difference in the displacement patterns leads to different energies of the metastable structures. The  
161 only other phonon irrep that these modes couple to is the fully symmetric  $\Gamma_{1+}$  mode. The amplitude of the  
162  $\Gamma_{1+}$  displacements for the  $E_{1u}$  structure is 0.154, which is significantly larger than the  $A_{1g}$  displacements for  
163  $E_{g1}$  (0.011) and  $E_{u1}$  (0.014) structures, which is possibly partially responsible of the larger energy gain of  
164 the  $E_{u1}$  structure.

165

166 The symmetry of these structures permit a component of strain that transform as  $\Gamma_{1+}$ , which does not  
167 change the symmetry, as well as a component that transforms as  $\Gamma_{4+}$ . However, even though this  $\Gamma_{4+}$   
168 component is allowed by symmetry, it is fixed to zero by the in-plane fixed strain boundary condition we  
169 impose.

170

171 **Supplementary Note 2 | Octahedral Rotations in Sr<sub>7</sub>Ti<sub>6</sub>O<sub>19</sub>**

172 Oxygen octahedral rotations are important for the polar properties of not only various perovskites but also  
173 many layered Ruddlesden-Popper compounds, such as Ca<sub>3</sub>Ti<sub>2</sub>O<sub>7</sub>. While they are relatively weak in bulk  
174 SrTiO<sub>3</sub>, and as a result are not expected to exist at room temperature in Sr<sub>n+1</sub>Ti<sub>n</sub>O<sub>3n+1</sub> RP's, we performed  
175 first principles calculations to predict their strength in these compounds.

176  
177 We performed frozen phonon calculations for Sr<sub>7</sub>Ti<sub>6</sub>O<sub>19</sub> with a tensile strain of 1.74% and identified the  
178 structural instabilities relevant to octahedral rotations. The Brillouin Zone of the high symmetry  
179 (paraelectric) space group I4/mmm (#139) is given in **Supplementary Figure 3**. The octahedral rotations  
180 in this structure correspond to lattice distortions with k-vector ( $\pi/a, \pi/a, 0$ ) in the conventional basis, which  
181 is the X point. The frozen phonon calculations are performed in a 2-formula unit (64 atom) supercell  
182 corresponding to this k-vector.

183  
184 The strongest instability at the X-point is a two-fold degenerate oxygen tilt around in-plane directions,  
185 shown schematically in **Supplementary Figure 4**. This mode consists of 99% oxygen displacements,  
186 which involve mostly rotations but also a small amount of octahedron distortion, and 1% of in-plane Sr  
187 displacements. While the imaginary frequency of this mode is 70 cm<sup>-1</sup>, which can be considered  
188 significant, this is misleading since this mode involves only oxygen displacements, which is by far the  
189 lightest atom in this crystal. A better measure of the strength of a static structural distortion is the force  
190 constants matrix (FCM) eigenvalue, which is the second derivative of the energy with respect to a  
191 particular lattice distortion. The FCM eigenvalue corresponding to this tilt mode is -0.30 eV Å<sup>-2</sup>, which is  
192 an order of magnitude smaller than the FCM eigenvalue of the leading polar mode, -2.60 eV Å<sup>-2</sup>. Thus we  
193 expect that the octahedral rotations do not have a significant effect on the polar transition.

194  
195 However, while this analysis shows that octahedral rotations are too weak to significantly affect the polar  
196 properties, it does not answer the question whether they can be present at the polar phase. In order to  
197 see whether the onset of polarization suppresses any rotational instabilities, we performed frozen phonon  
198 calculations for the X point in the ferroelectric phase as well. Since polarization breaks the 4-fold

199 rotational symmetry (so that the x and y directions are no longer equal) the rotational instability is no  
200 longer two fold degenerate. And interestingly, the presence of the polarization does not suppress the  
201 rotational instability along one of the in-plane directions, and there is still an instability with a FCM  
202 eigenvalue of  $-0.30 \text{ eV \AA}^{-2}$ .

203

204 This shows that *at zero temperature* there are octahedral rotations in  $\text{Sr}_7\text{Ti}_6\text{O}_{19}$ , in addition to the (anti-  
205 )polar distortions. While a finite temperature prediction of the crystal structure is beyond the scope of this  
206 study, since the FCM eigenvalue of the octahedral rotational instability is almost an order of magnitude  
207 smaller than that of the FE mode, we expect that the onset of octahedral rotations occur at a much  
208 smaller temperature. As a result, it is very unlikely to see any signature of octahedral rotations in our room  
209 temperature measurements.

210

211 **Supplementary Reference**

- 212 1. Lee, J. & Arias, T. A. Structural phase transitions in Ruddlesden-Popper phases of strontium titanate:  
213 Ab initio and modulated Ginzburg-Landau approaches. *Phys. Rev. B - Condens. Matter Mater. Phys.* **82**,  
214 180104(R) (2010).
